# Supplementary material for: Human astrocytes and microglia show augmented ingestion of synapses in Alzheimer’s disease via MFG-E8
Source: PubMed Central journal article supplement (PMC10518633; doi:10.1016/j.xcrm.2023.101175), 2023-08-30
Supplement: mmc1.pdf [file mmc1.pdf]

**Supplemental information**

**Human astrocytes and microglia  
show augmented ingestion of synapses  
in Alzheimer's disease via MFG-E8**

**Makis Tzioras, Michael J.D. Daniels, Caitlin Davies, Paul Baxter, Declan King, Sean McKay, Balazs Varga, Karla Popovic, Madison Hernandez, Anna J. Stevenson, Jack Barrington, Elizabeth Drinkwater, Julia Borella, Rebecca K. Holloway, Jane Tulloch, Jonathan Moss, Clare Latta, Jothy Kandasamy, Drahoslav Sokol, Colin Smith, Veronique E. Miron, Ragnhildur Thóra Káradóttir, Giles E. Hardingham, Christopher M. Henstridge, Paul M. Brennan, Barry W. McColl, and Tara L. Spires-Jones**

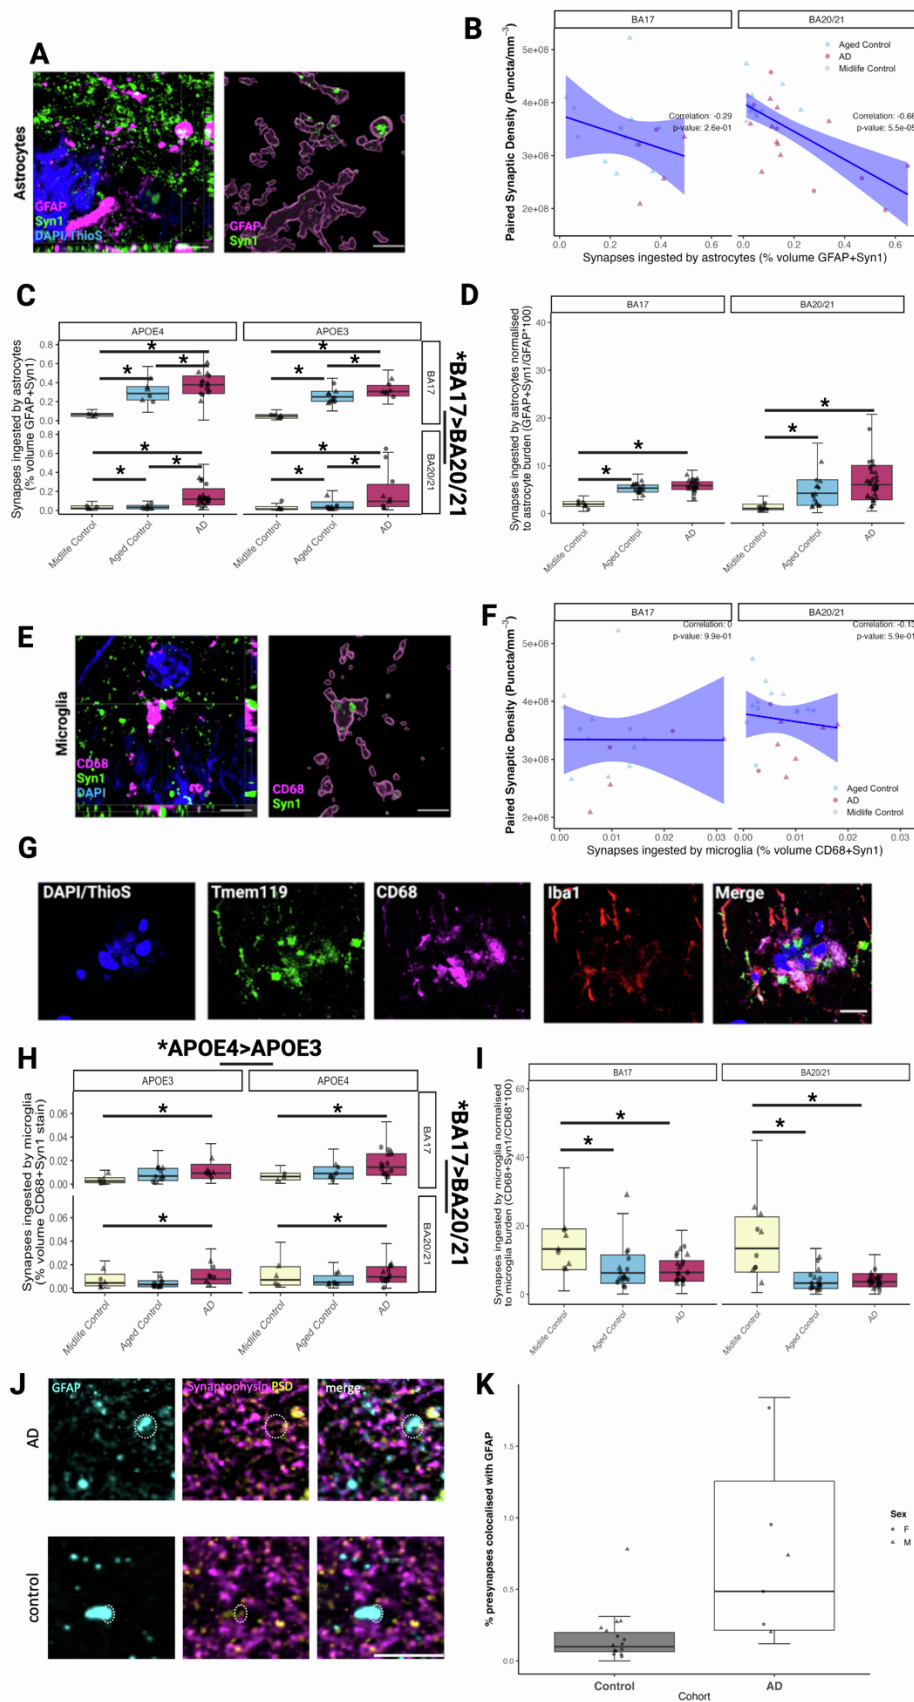

**Figure S1. Supplementary statistics and validation microscopy, Related to Figures 1-3.** (A) Super-resolution confocal using an Airyscan microscope confirm synaptic engulfment by astrocytes in AD (orthogonal view left, 3D reconstruction right). Scale bar represents 5 $\mu$ m. (B) Correlation analysis shows a significant negative correlation between

synapse density determined with array tomography and synaptic colocalization with astrocytes in BA20/21. (C) There is an effect of *APOE* genotype with *APOE4* carriers having more astrocyte engulfment than *APOE3* carriers. Also there is more engulfment in BA17 compared to BA20/21. (D) When normalized to GFAP burden, synaptic colocalization with GFAP was increased in AD compared to mid-life controls and increased in healthy ageing compared to mid-life controls. (E) Super-resolution confocal using an Airyscan microscope confirm synaptic engulfment by microglia in AD (orthogonal view left, 3D reconstruction right). Scale bar represents 5 $\mu$ m. (F) Correlation analysis shows no significant correlations between synapse density determined with array tomography and synaptic colocalization with microglia in either brain region. (G) CD68 staining was confirmed to colocalise with Tmem119 and Iba1. Scale bar represents 20 $\mu$ m. (H) There is an effect of *APOE* genotype with *APOE4* carriers having more astrocyte engulfment than *APOE3* carriers. Also there is more engulfment in BA17 compared to BA20/21. (I) When normalized to CD68 burden, the synaptic ingestion by microglia was no longer higher in AD cases compared to controls indicating the increase in AD in microglial ingestion of synapses is driven by microgliosis. (J) Array tomography imaging of GFAP and synaptic proteins confirms synaptic ingestion by astrocytes. Scale bar represents 10 $\mu$ m. (K) There is significantly more synaptic ingestion by astrocytes in AD than control when measured with array tomography (ANOVA after linear mixed effects model,  $F[1,16]=12.11$ ,  $p=0.003$ ).

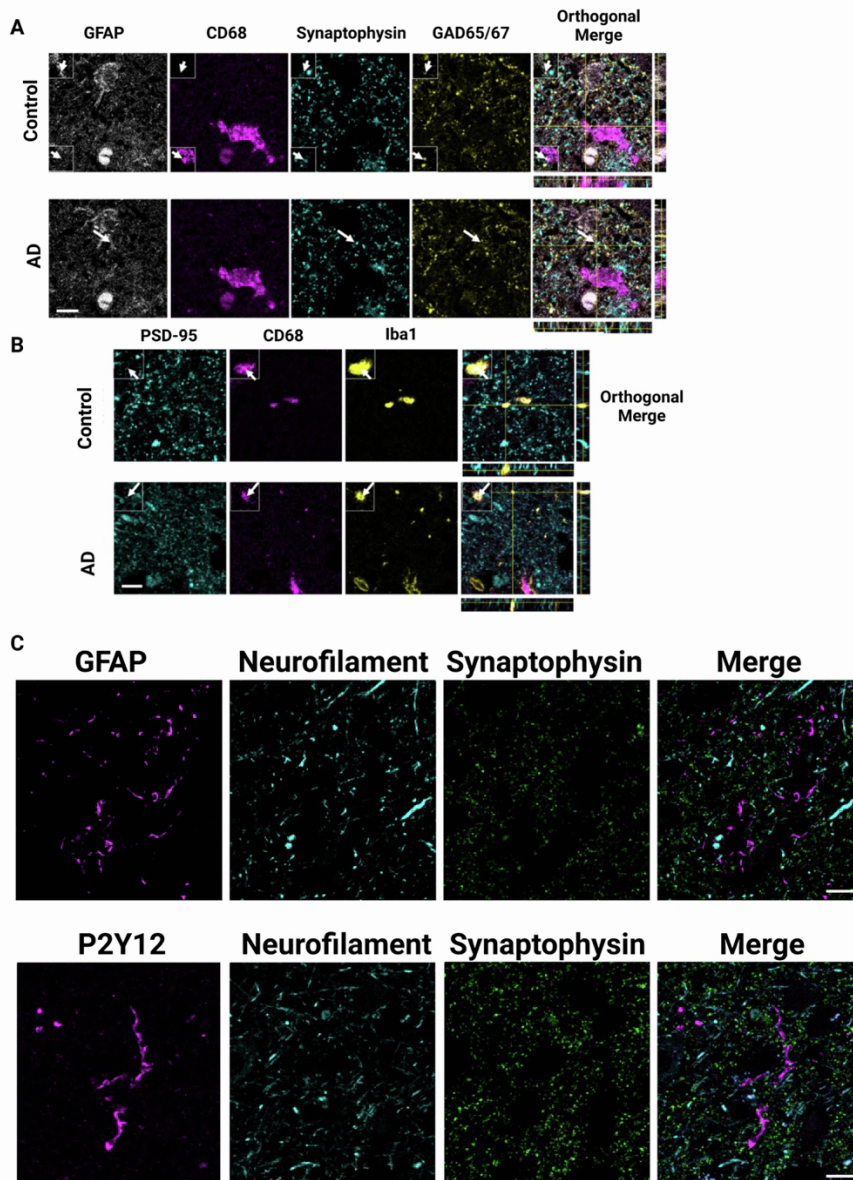

**Figure S2. Glial co-staining with multiple synaptic markers. Related to Figures 1-3.**

(A) Confocal images of staining with GFAP, CD68, synaptophysin, and GAD65/67 shows inhibitory synaptic protein inside astrocytes and microglia (arrows). (B) Excitatory postsynaptic protein PSD95 is also observed in CD68 and Iba1 double positive microglia (arrows, B). (C) Staining with axonal neurofilament (cyan) alongside GFAP or P2Y12 (magenta) and synaptophysin (green) did not show substantial colocalization between astrocytes or microglia and axonal neurofilament. Scale bars represent 10 $\mu$ m. Insets are 5 x 5  $\mu$ m.

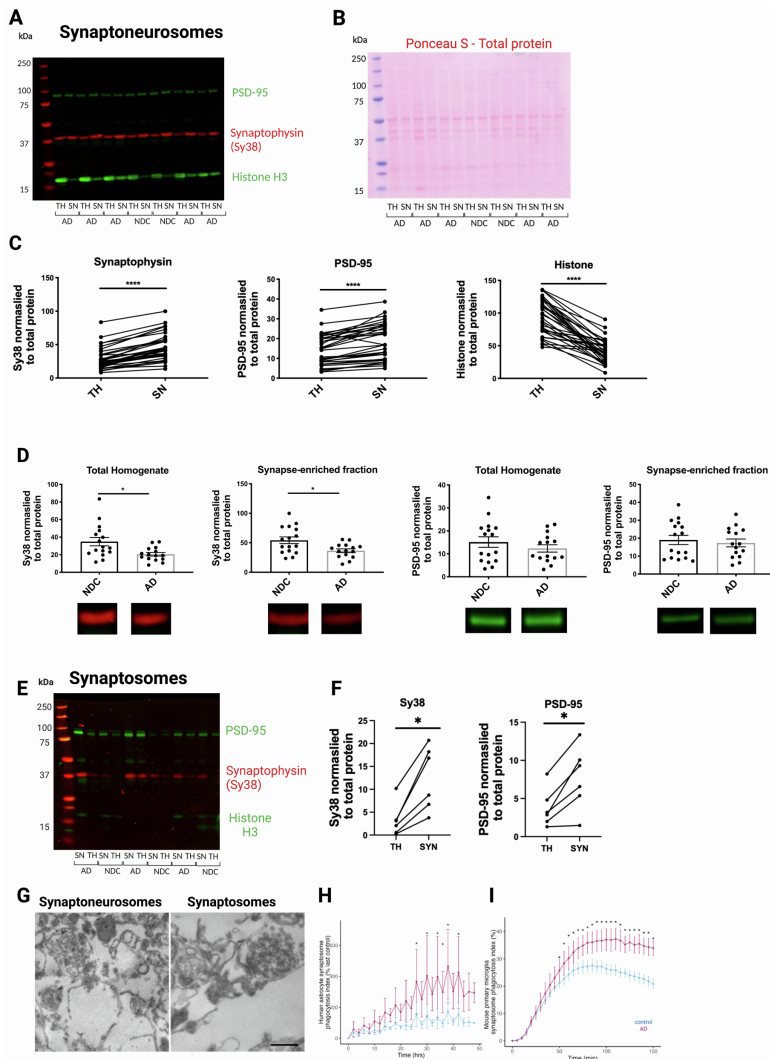

**Figure S3. Validation of synaptoneurosome and synaptosome preparations. Related to Figures 4-6.** (A) Representative image of full-length Western blot, indicating whether a sample is from total homogenate (TH) or synaptoneurosomes (SN), and their corresponding disease status. Bands were quantified on Image Studio, and normalised to total protein, quantified by Ponceau S. (B) Ponceau S staining for total protein from gel shown in A (NDC=no disease control, AD=Alzheimer's disease). (C) Significantly increased protein levels of the pre- and post-synaptic markers synaptophysin (Sy38) and PSD-95, respectively, as well as decreased protein levels of histone (H3), indicating exclusion of non-synaptic material (Wilcoxon matched-pairs signed rank test,  $***p < 0.0001$ ,  $n=31$ ). Lines link the two different preparations from the same case. (D) Decreased levels of synaptophysin (Sy38) in the total homogenate (Mann-Whitney test,  $p=0.0106$ ) and synaptoneurosome fraction (unpaired Student's t-test,  $p=0.0121$ ) of AD cases ( $n=15$ ), compared to age-matched NDC cases ( $n=16$ ), as detected by Western blot. PSD-95 protein levels were not different between AD and NDC groups in total homogenate (unpaired Student's t-test,  $p=0.332$ ), nor in the synaptoneurosome fraction (unpaired Student's t-test,  $p=0.627$ ). (E) Representative image of full-length Western blot for synaptophysin, PSD-95 and histone H3, indicating whether a sample is from total homogenate (TH) or synaptoneurosomes (SN), and their corresponding disease status. Bands were quantified on Image Studio, and normalised to total protein, quantified by Ponceau S. (F) Significantly increased protein levels of the pre- and post-synaptic markers synaptophysin (Sy38) and PSD-95, respectively, (Wilcoxon matched-pairs signed rank test,  $*p < 0.05$ ,  $n=3$ ). Lines link the two different preparations from the same case. (G) Synaptoneurosome and synaptosome pellets were embedded for electron microscopy confirming synaptic structures in both types of synaptic enrichment (scale bar 300 nm). (H) As seen with synaptoneurosomes, pHrodo tagged human synaptosomes from AD brain were phagocytosed more and faster by human astrocytes. (I) AD-derived human synaptosomes also ingested more than control by mouse microglia, similar to the synaptoneurosomes. For statistics,  $*p < 0.05$ .

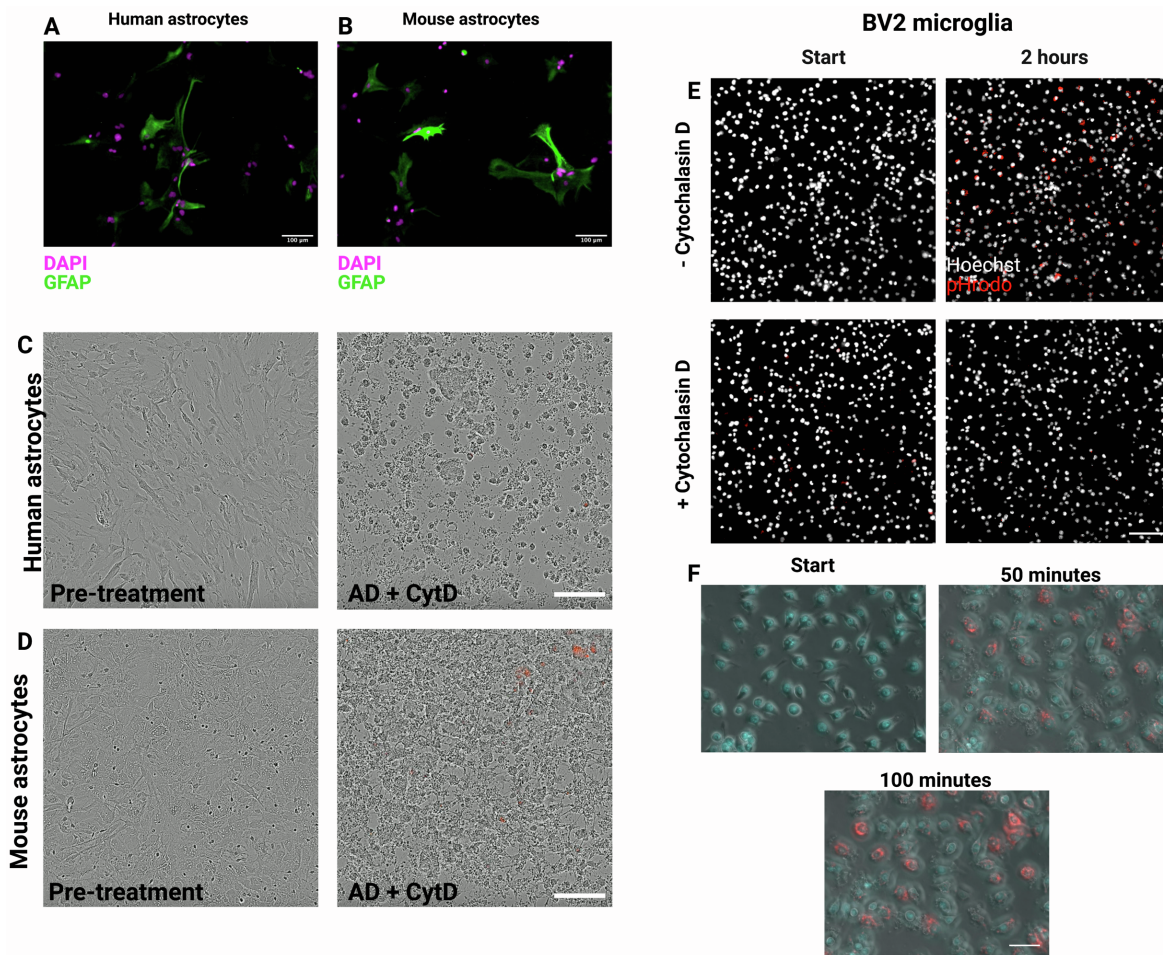

**Figure S4. Validation of synaptoneurosome ingestion by astrocytes and microglia. Related to Figures 4-6.** (A) Primary human astrocytes stained for GFAP (green) shows most cells express the marker, indicating a pure astrocytic culture. (B) Primary mouse astrocytes stained for GFAP (green) shows cells express the marker, although some cells do not. Scale bars represent 100 $\mu$ m. (C) Primary human astrocytes treated with cytochalasin D prior to phagocytosis assay, blocking phagocytosis. Scale bar 200 $\mu$ m. (D) Primary mouse astrocytes treated with cytochalasin D prior to phagocytosis assay, blocking phagocytosis. Scale bar 200 $\mu$ m. (E) Still images from live imaging of BV2 microglia (Hoechst-positive nuclei in grey) undergoing phagocytosis of human synaptoneurosomes tagged with pHrodo. Synaptoneurosomes can be seen in red as they enter the acidic phago-lysosomal compartment of the cell. (F) Cells treated with 10 $\mu$ M of Cytochalasin D 30 minutes prior to the experiment showed no phagocytosis. Scale bar represents 30 $\mu$ m. (G) Live imaging of BV2 microglia (phase with Hoechst-positive nuclei in cyan) undergoing phagocytosis of human synaptoneurosomes tagged with pHrodo (can be seen as small spheroids on phase contrast). Synaptoneurosomes become red once they enter the acidic phago-lysosomal compartment of the cell. Each panel represents an image 50 minutes apart. Scale bar represents 50 $\mu$ m.

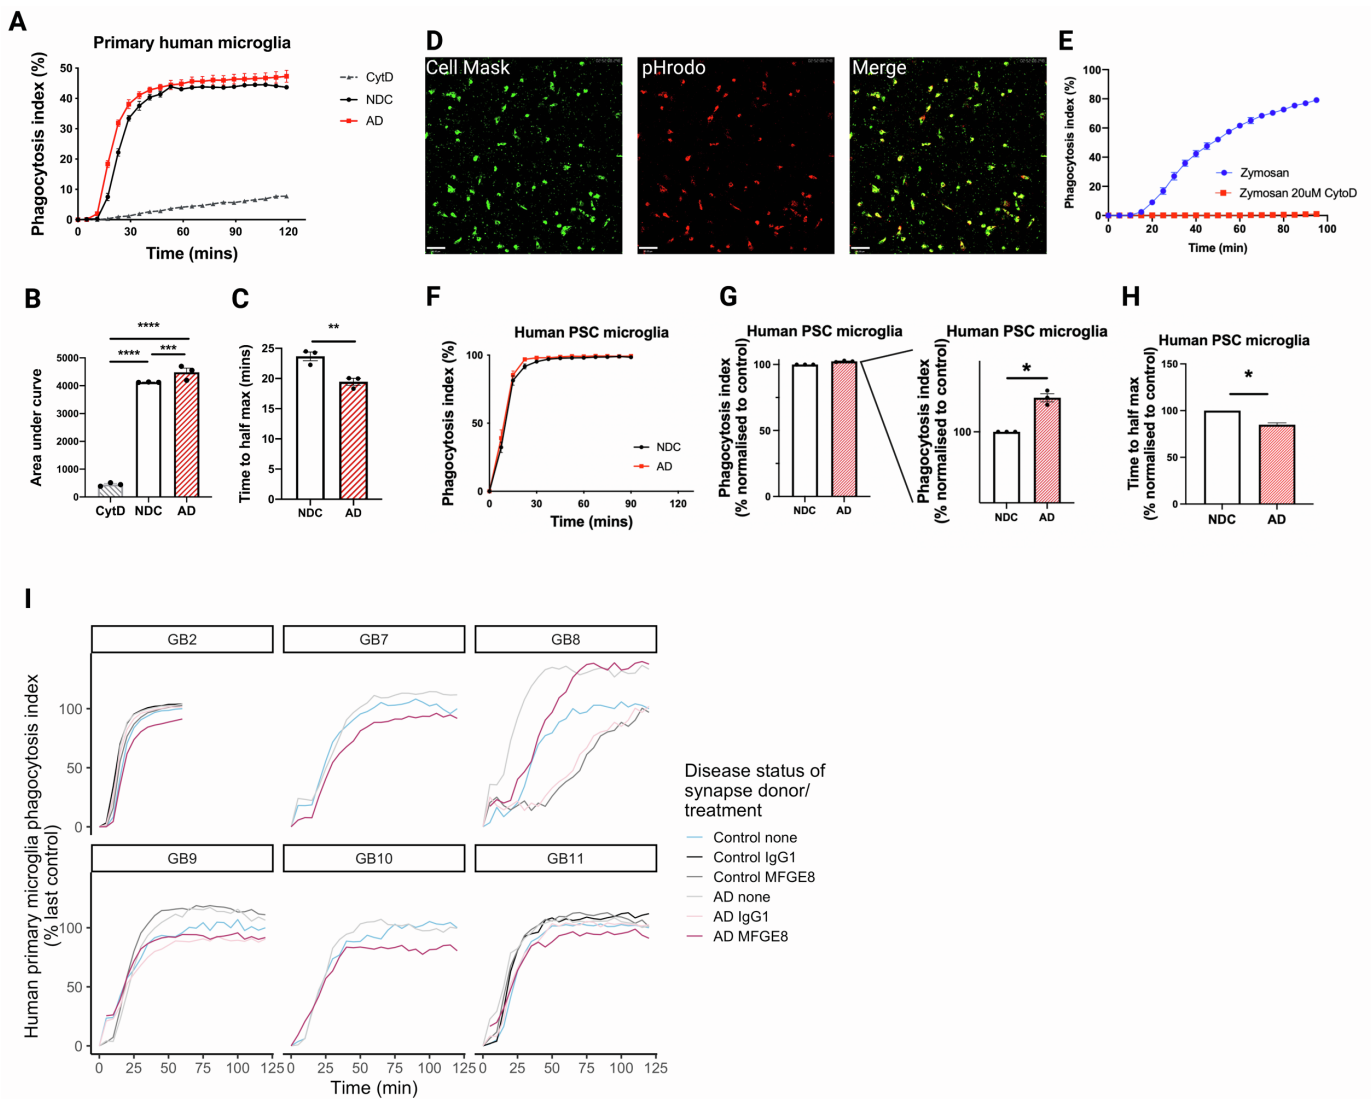

**Figure S5. Increased phagocytosis of AD-derived synaptoneuroosomes by human iPSC and primary microglia. Related to Figures 5 and 6.** (A) Phagocytosis index of primary human microglia from an epilepsy case engulfing human synaptoneuroosomes (n=1 human sample, replicated in 3 wells from an average of 9 images per well). CytD= cytochalasin D, NDC= non-demented control, AD= Alzheimer's disease. (B) Area under curve from A (one-way ANOVA with Tukey's multiple comparisons test,  $p=0.0004$ ). (C) Time to half-maximum phagocytosis was calculated from the curve shown in A (unpaired Student's t-test,  $p=0.0098$ ). For statistics,  $**p<0.01$ ,  $***p<0.001$ ,  $****p<0.0001$ . Data shown as mean  $\pm$  SEM. (D) Representative images of human PSC derived microglia-like cells labelled with Cellmask Deep red (green), showing phagocytosed pHrodo labelled synaptoneuroosomes (red) at the end of imaging time. Scalebar:  $80\mu\text{m}$ . (E) Zymosan beads are readily phagocytosed by human PSC microglia in culture, and treatment of cytochalasin D (CytoD) is sufficient to completely abolish it. Data shown as mean  $\pm$  SEM. (F) All cell lines showed phagocytosis of SNS particles, the responsiveness and dynamics of microglia to AD and control material uptake depends on the individual cell lines. (G) Total amount of labelled particles as measured by the area under the curve was increased in PSC derived microglia presented with synaptoneuroosomes from AD brain compared to NDC (one sample t-test,  $p=0.0142$ , hypothetical value=100). (H) PSC derived microglia-like cells phagocytosed AD SNS particles faster compared to NDC particles measured by the half max time (one sample t-test,  $p=0.016$ , hypothetical value=100). In all conditions,  $n=3$  indicating lines from separate iPSC donors. For statistics,  $*p<0.05$ , and data shown as mean  $\pm$  SEM). CytD= cytochalasin D, NDC= no disease control, AD= Alzheimer's disease. (I) The small surgical samples from which microglia were derived were not always sufficient to test all conditions. From our 11 donors, all had AD vs control synapse conditions, two had these and in addition AD synapses treated with MFG-E8 antibody, and 4 included all conditions (control and AD synapses with anti-MFG-E8, IgG1 control, or no treatment). In all 6 cases with MFG-E8 antibody pre-incubation, MFG-E8 antibody pre-treatment reduced AD synaptic phagocytosis compared to AD without antibody pre-treatment. In the 4 cases with IgG control, 2 had clear reduction in phagocytosis with MFGE8 compared to control IgG (GB11, GB2), one had no difference between MFGE8 and IgG (GB9), and one had increased phagocytosis with MFGE8 compared to IgG (GB8). From these data we conclude that while there is not a clear rescue of phenotype specifically with the MFG-E8 antibody treatment as seen for astrocytes, the microglial data show "responders" and "non-responders" to this treatment compared to IgG1 and all cases had a clear reduction in phagocytosis with either IgG1 or MFGE-8 treatment indicating that IgG on synapses may be an opsonin recognized by microglia.

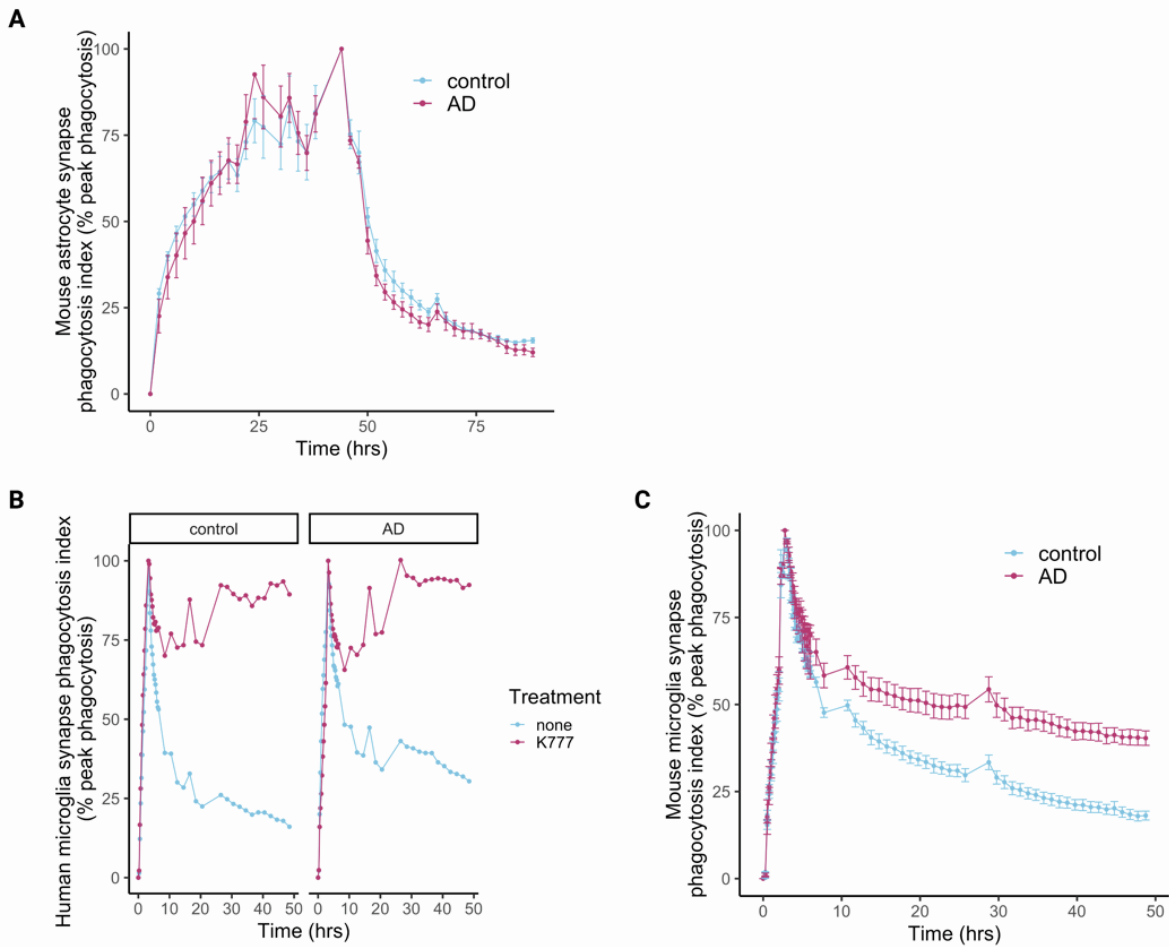

**Figure S6. Degradation assays of mouse and human primary microglia, Related to Figures 5 and 6.** (A) Degradation assay in primary mouse astrocytes (n=4 replicates) of human control and Alzheimer's disease (AD) synaptoneuroosomes shows no differences in degradation throughout the assay. (B) Degradation assay in primary human microglia (n=1, GB12) of human control and Alzheimer's disease (AD) synaptoneuroosomes shows no differences in degradation in the 2 hours of the assay. Both control and AD synaptoneuroosomes are efficiently degraded over time, which is blocked by the pan-cathepsin inhibitor K777. (C) Degradation assay in primary mouse microglia (n=4 adult mice) of human control and Alzheimer's disease (AD) synaptoneuroosomes shows no differences in degradation in the first 2 hours of the assay. Both control and AD synaptoneuroosomes are efficiently degraded over time.

| BBN/<br>CaseID | SD<br>number | Disease         | APOE  | Age<br>(years) | Gender | PMI<br>(hrs) | Braak<br>Stage | Experiment |
|----------------|--------------|-----------------|-------|----------------|--------|--------------|----------------|------------|
| 29693          | SD002/17     | Midlife control | APOE4 | 49             | F      | 94           | NA             | IHC        |
| 24479          | SD005/15     | Midlife control | APOE4 | 46             | F      | 76           | NA             | IHC        |
| 33613          | SD014/18     | Midlife control | APOE3 | 46             | F      | 99           | NA             | IHC        |
| 28959          | SD022/16     | Midlife control | APOE3 | 39             | M      | 86           | NA             | IHC        |
| 30169          | SD022/17     | Midlife control | APOE4 | 48             | M      | 58           | NA             | IHC        |
| 28960          | SD026/16     | Midlife control | APOE3 | 37             | F      | 126          | NA             | IHC        |
| 34244          | SD036/18     | Midlife control | APOE3 | 49             | F      | 69           | NA             | IHC        |
| 24342          | SD053/14     | Midlife control | APOE3 | 33             | M      | 47           | NA             | IHC        |
| 29906          | SD013/17     | Midlife control | APOE4 | 51             | M      | 52           | NA             | IHC        |
| 1.28793        | SD017/16     | Aged Control    | APOE3 | 79             | F      | 72           | 2              | IHC        |
| 14395          | SD014/13     | Aged Control    | APOE3 | 74             | F      | 41           | NA             | IHC + SNS  |
| 19686          | SD063/13     | Aged Control    | APOE3 | 76             | F      | 75           | 1              | IHC + SNS  |
| 20122          | SD003/14     | Aged Control    | APOE3 | 59             | M      | 74           | NA             | IHC + SNS  |
| 22612          | SD022/14     | Aged Control    | APOE3 | 61             | M      | 70           | NA             | IHC + SNS  |
| 26495          | SD024/15     | Aged Control    | APOE3 | 78             | M      | 39           | 1              | IHC + SNS  |
| 28402          | SD051/15     | Aged Control    | APOE3 | 78             | M      | 49           | 1              | IHC + SNS  |
| 28406          | SD001/16     | Aged Control    | APOE3 | 79             | M      | 72           | 2              | IHC + SNS  |
| 28797          | SD025/16     | Aged Control    | APOE3 | 79             | M      | 57           | NA             | IHC + SNS  |
| 29086          | SD034/16     | Aged Control    | APOE3 | 79             | F      | 68           | NA             | IHC + SNS  |
| 32577          | SD002/18     | Aged Control    | APOE3 | 81             | M      | 74           | 2              | IHC        |
| 1.34131        | SD029/18     | Aged Control    | APOE4 | 82             | M      | 95           | 4              | IHC        |
| 15809          | SD029/13     | Aged Control    | APOE4 | 58             | M      | 90           | NA             | IHC + SNS  |
| 16425          | SD032/13     | Aged Control    | APOE4 | 61             | M      | 99           | NA             | IHC + SNS  |
| 20593          | SD006/14     | Aged Control    | APOE4 | 60             | M      | 52           | NA             | IHC + SNS  |
| 22629          | SD035/14     | Aged Control    | APOE4 | 59             | F      | 53           | NA             | IHC + SNS  |
| 29082          | SD031/16     | Aged Control    | APOE4 | 79             | F      | 80           | 3              | IHC + SNS  |
| 31495          | SD043/17     | Aged Control    | APOE4 | 81             | M      | 38           | 6              | IHC + SNS  |
| 1.29081        | SD030/16     | AD              | APOE3 | 90             | F      | 110          | 2              | IHC        |
| 1.30142        | SD020/17     | AD              | APOE3 | 88             | F      | 112          | 2              | IHC        |
| 15258          | SD026/13     | AD              | APOE3 | 65             | M      | 80           | 6              | IHC + SNS  |
| 19595          | SD062/13     | AD              | APOE3 | 87             | M      | 58           | 6              | IHC + SNS  |
| 19994          | SD002/14     | AD              | APOE3 | 87             | F      | 89           | 6              | IHC + SNS  |
| 24527          | SD056/14     | AD              | APOE3 | 81             | M      | 74           | 5              | IHC        |
| 28410          | SD005/16     | AD              | APOE3 | 62             | F      | 109          | 6              | IHC + SNS  |
| 28771          | SD010/16     | AD              | APOE3 | 85             | M      | 91           | 6              | IHC        |



|         |          |    |       |    |   |     |    |           |
|---------|----------|----|-------|----|---|-----|----|-----------|
| 32929   | SD012/18 | AD | APOE3 | 87 | F | 83  | 4  | IHC       |
| 1.265   | SD039/15 | AD | APOE4 | 81 | M | 83  | 6  | IHC       |
| 1.26732 | SD048/15 | AD | APOE4 | 76 | M | 66  | 6  | IHC + SNS |
| 1.28796 | SD021/16 | AD | APOE4 | 60 | F | 54  | 6  | IHC       |
| 1.29135 | SD027/16 | AD | APOE4 | 90 | M | 73  | 6  | IHC       |
| 1.30883 | SD034/17 | AD | APOE4 | 61 | F | 69  | 6  | IHC       |
| 1.30973 | SD039/17 | AD | APOE4 | 89 | F | 96  | 6  | IHC       |
| 1.31499 | SD044/17 | AD | APOE4 | 85 | M | 78  | 6  | IHC       |
| 1.33636 | SD017/18 | AD | APOE4 | 93 | M | 43  | 2  | IHC       |
| 1.33698 | SD022/18 | AD | APOE4 | 90 | F | 76  | NA | IHC       |
| 10591   | SD003/13 | AD | APOE4 | 76 | M | 76  | 6  | IHC + SNS |
| 15256   | SD034/13 | AD | APOE4 | 60 | M | 28  | 5  | IHC       |
| 15810   | SD018/13 | AD | APOE4 | 73 | F | 96  | 6  | IHC       |
| 15811   | SD021/13 | AD | APOE4 | 81 | F | 41  | 6  | IHC       |
| 19690   | SD064/13 | AD | APOE4 | 57 | M | 58  | 6  | IHC + SNS |
| 20995   | SD019/14 | AD | APOE4 | 60 | M | 86  | 6  | IHC + SNS |
| 23394   | SD038/14 | AD | APOE4 | 88 | F | 59  | 5  | IHC + SNS |
| 24322   | SD049/14 | AD | APOE4 | 80 | M | 101 | 6  | IHC + SNS |
| 24526   | SD055/14 | AD | APOE4 | 79 | M | 65  | 6  | IHC       |
| 24668   | SD058/14 | AD | APOE4 | 96 | F | 61  | 6  | IHC       |
| 25739   | SD014/15 | AD | APOE4 | 85 | F | 45  | 6  | IHC + SNS |
| 26718   | SD040/15 | AD | APOE4 | 78 | M | 74  | 6  | IHC + SNS |
| 29521   | SD035/16 | AD | APOE4 | 95 | M | 96  | 6  | IHC + SNS |
| 29695   | SD004/17 | AD | APOE4 | 86 | M | 72  | 6  | IHC + SNS |

**Table S1. Human cases used in the study. (NA=not available, IHC = immunohistochemistry, SNS = synaptoneurosome)**

| <b>CaseID</b> | <b>Age</b> | <b>Gender</b> | <b>Brain Region resected</b> |
|---------------|------------|---------------|------------------------------|
| GB1           | 55         | M             | parietal lobe                |
| GB2           | 50         | F             | temporal lobe                |
| GB3           | 50         | M             | frontal lobe                 |
| GB5           | 50         | F             | parietal lobe                |
| GB6           | 60         | F             | parietal lobe                |
| GB7           | 60         | F             | frontal lobe                 |
| GB8           | 60         | F             | frontal lobe                 |
| GB9           | 50         | F             | frontal lobe                 |
| GB10          | 60         | M             | frontal lobe                 |
| GB11          | 70         | M             | frontal lobe                 |
| GB12          | 71         | M             | parietal-occipital lobe      |

**Table S2. Data from human donors from glioblastoma surgeries, Related to figures 5 and 6.**
